# Supplementary material for: Syrbactin-class dual constitutive- and immuno-proteasome inhibitor TIR-199 impedes myeloma-mediated bone degeneration in vivo
Source: Oxford University Press journal article supplement (doi:10.1042/bsr20212721), 2022-01-28
Supplement: bsr-2021-2721_supp.pdf [file bsr-2021-2721_supp.pdf]

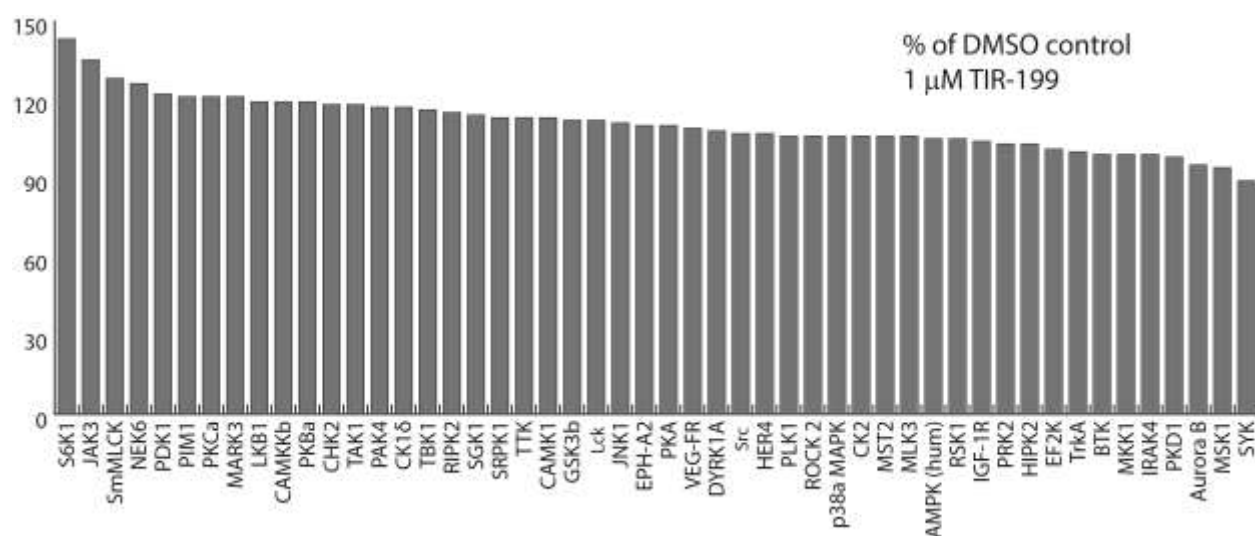

**Supplementary Figure S1 TIR-199 does not inhibit the activity of 50 kinases in vitro.** Kinase profiling of TIR-199 at 1  $\mu$ M was carried out against the panel of 50 kinases at the International Centre for Protein Kinase Profiling (<http://www.kinase-screen.mrc.ac.uk/>).

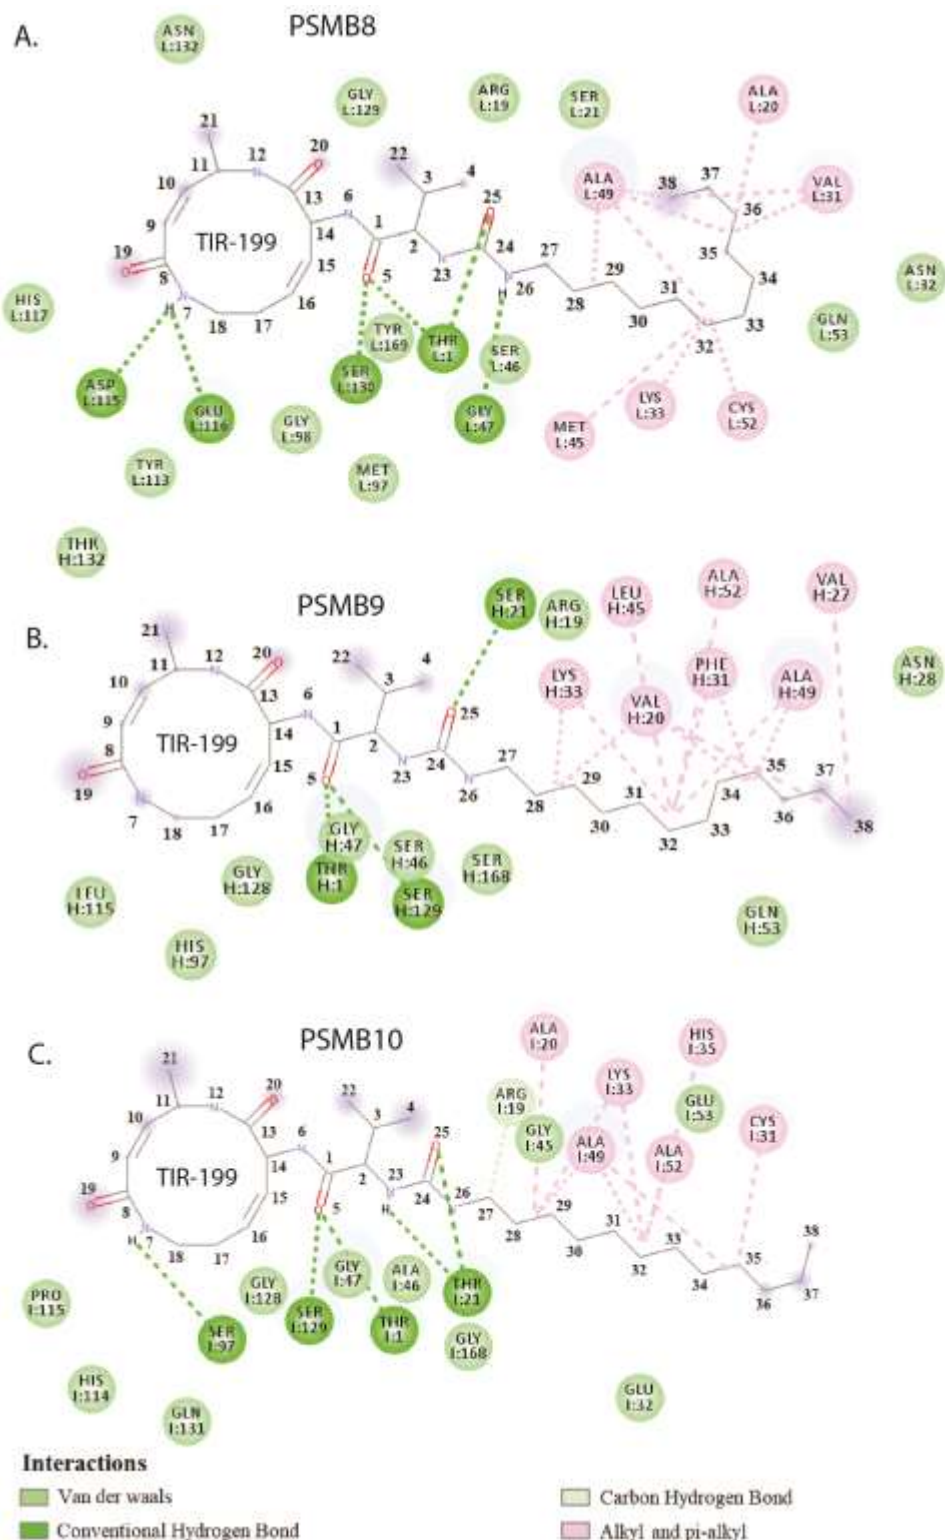

**Supplementary Figure S2** TIR-199 is predicted to form more hydrogen bonds while binding to PSMB8 compared to PSMB9 or PSMB10. 2D interaction diagram showing TIR-199 docking mechanism in the active site of PSMB8 (A), PSMB9 (B), PSMB10 (C).
